# Supplementary material for: Coupling between the photo-excited cyclic π system and the 4f electronic system in a lanthanide single molecule magnet
Source: Royal Society of Chemistry journal article supplement (doi:10.1039/c7cc02960h), 2017-01-01
Supplement: c7cc02960h1.pdf [file c7cc02960h1.pdf]

Supporting Information

## A Coupling between a photo-excited cyclic $\pi$ system and the 4f electronic system in a lanthanide single molecule magnet

Kazuro Kizaki, Hideaki Ozawa, Toshiya Kobayashi, Ryota Matsuoka, Yutaro Sakaguchi,  
Akira Fuyuhiko, Takamitsu Fukuda, Naoto Ishikawa\*

Department of Chemistry, Graduate School of Science,  
Osaka University

Machikaneyamacho, Toyonaka, Osaka 560-0043, Japan  
iskw@chem.sci.osaka-u.ac.jp

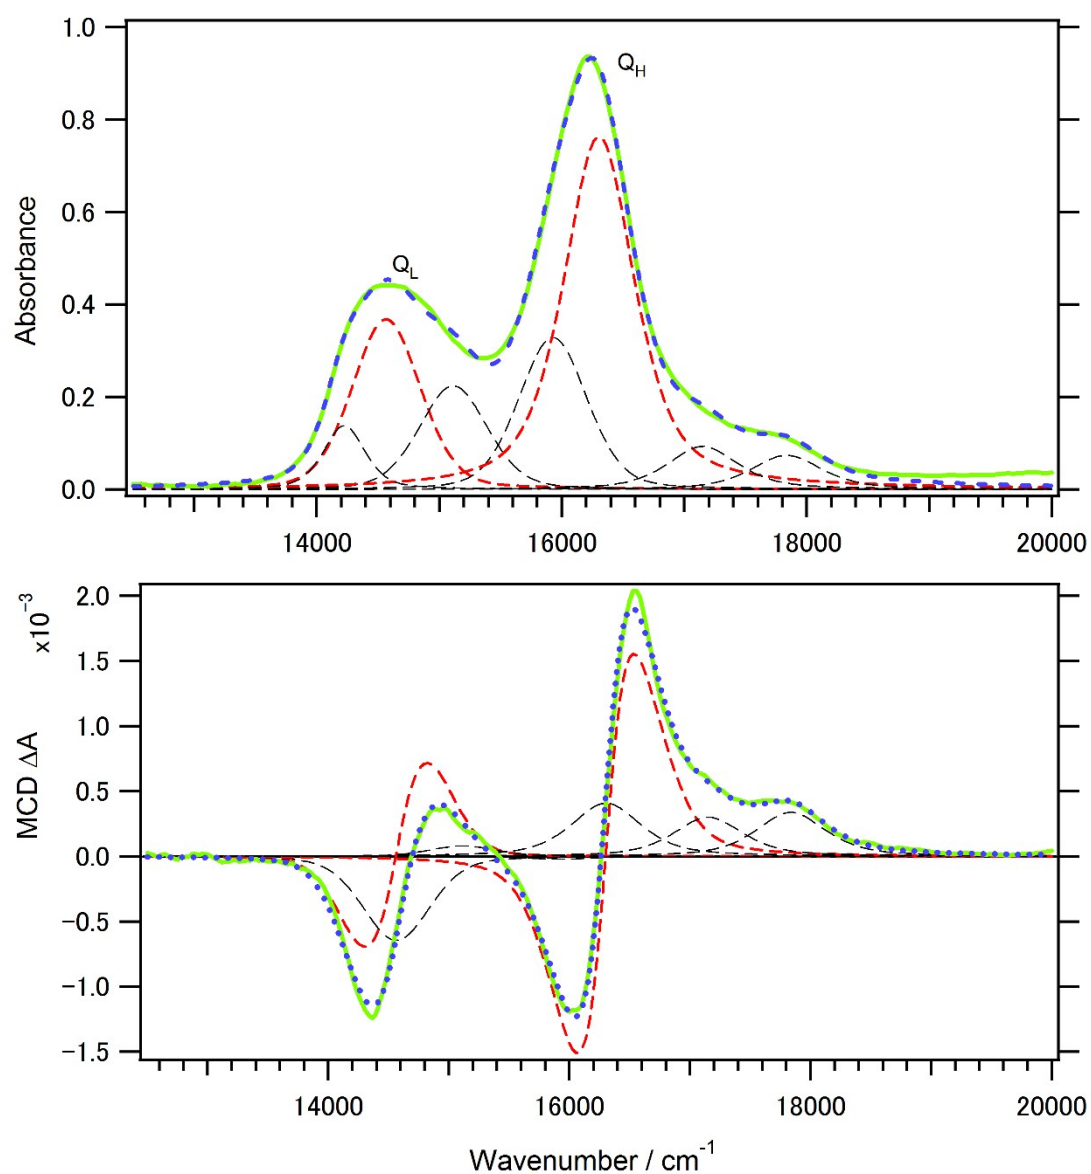

**Figure S1** Results of band deconvolution of absorption (top) and MCD (bottom) spectra of  $\text{Pc}_2\text{Y}^-$  doped in PMMA measured at 1.5K under a magnetic field of 1T. Observed spectra are shown in solid lines (green). A-term components are shown in thick broken lines (red) and B-term components in thin broken lines (black). The Sum of these components are shown in dotted lines (blue).

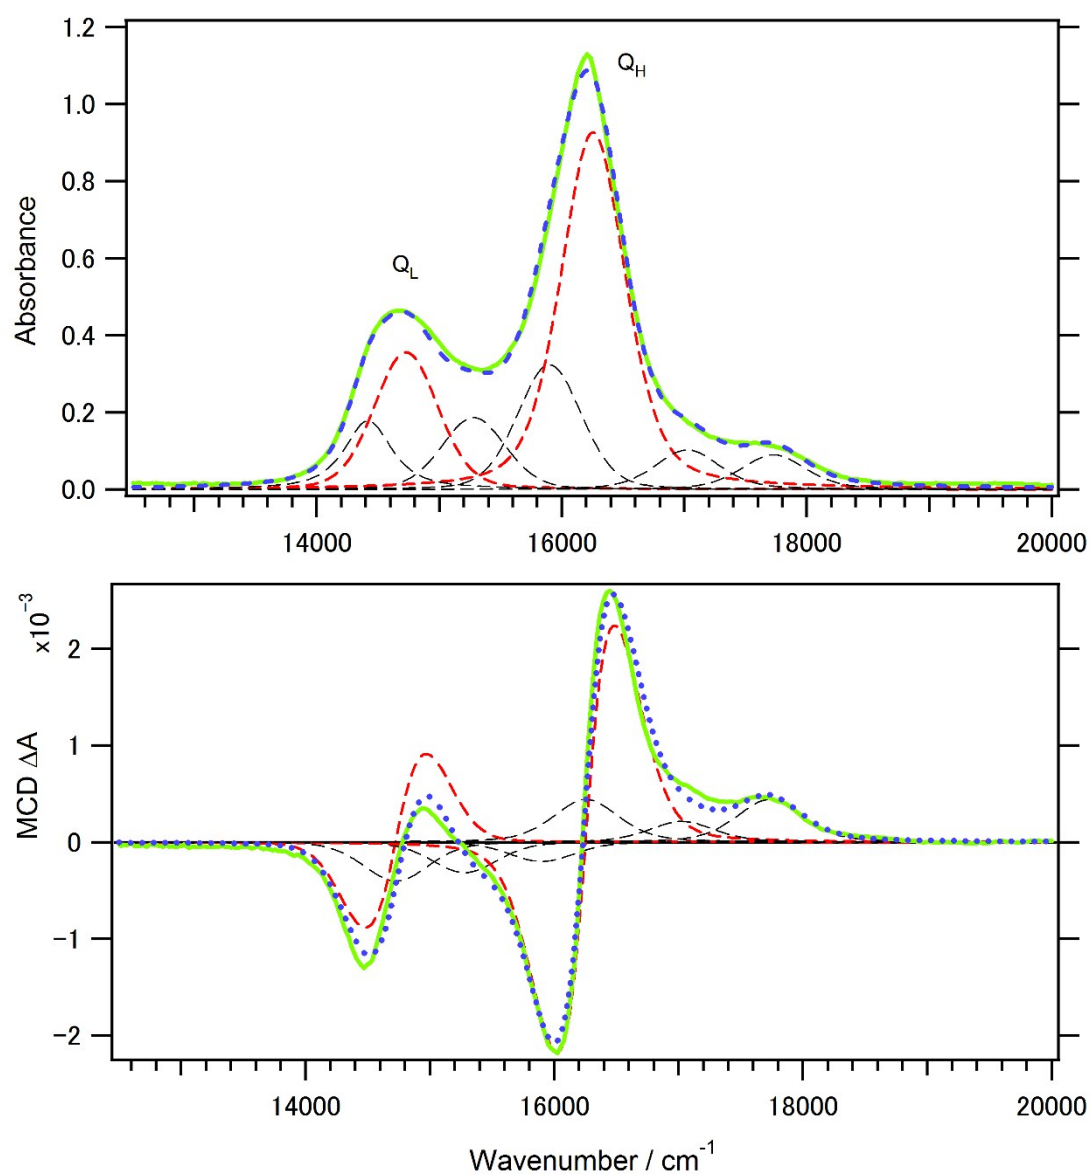

**Figure S2** Results of band deconvolution of absorption (top) and MCD (bottom) spectra of  $\text{Pc}_2\text{Tb}^-$  doped in PMMA measured at 100K under a magnetic field of 1T. Observed spectra are shown in solid lines (green). A-term components are shown in thick broken lines (red) and B-term components in thin broken lines (black). The Sum of these components are shown in dotted lines (blue).

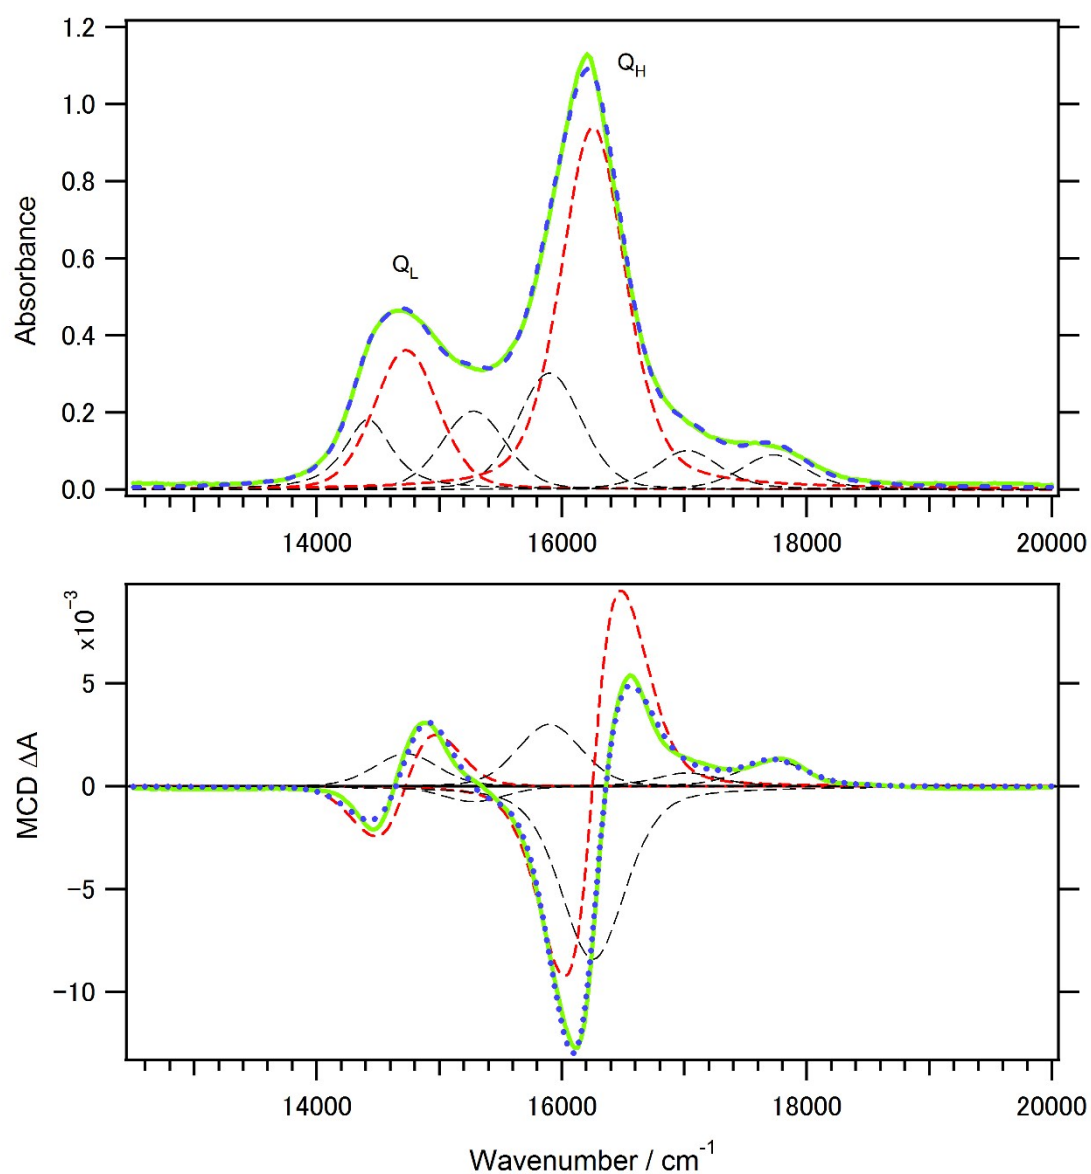

**Figure S3** Results of band deconvolution of absorption (top) and MCD (bottom) spectra of  $\text{Pc}_2\text{Tb}^-$  doped in PMMA measured at 1.5K under a magnetic field of 1T. Observed spectra are shown in solid lines (green). A-term components are shown in thick broken lines (red) and B-term components in thin broken lines (black). The Sum of these components are shown in dotted lines (blue).

**Table S1** Parameters determined by the band deconvolution of absorption and MCD spectra of  $\text{Pc}_2\text{Y}^-$  doped in PMMA measured at 1.5K.

| $E_0$ (cm <sup>-1</sup> ) <sup>a</sup> | $\Gamma$ (cm <sup>-1</sup> ) <sup>a</sup> | $\eta^a$ | $D_0$ | $A_1/D_0$ | $B_0/D_0$ |
|----------------------------------------|-------------------------------------------|----------|-------|-----------|-----------|
| 14221                                  | 402                                       | 0.576    | 1.8   |           | 0.0       |
| 14560                                  | 656                                       | 0.315    | 7.1   | 2.0       | -0.0037   |
| 15108                                  | 656                                       | 0.315    | 4.1   |           | 0.00070   |
| 15922                                  | 656                                       | 0.315    | 5.8   |           | -0.00019  |
| 16299                                  | 685                                       | 0.683    | 15.8  | 2.2       | 0.0011    |
| 17146                                  | 685                                       | 0.683    | 1.8   |           | 0.0078    |
| 17831                                  | 685                                       | 0.683    | 1.4   |           | 0.0095    |

a)  $E_0$ ,  $\Gamma$ ,  $\eta$  are the parameters defining the normalized pseudo-Voigt function,

$$f(E) = (1 - \eta)f_G(E;E_0,\gamma_G) + \eta f_L(E;E_0,\gamma_L)$$

where  $f_G(E;E_0,\gamma_G)$  and  $f_L(E;E_0,\gamma_L)$  are the normalized Gaussian and Lorentzian function,

$$f_G(E;E_0,\gamma_G) = \left( \frac{1}{\sqrt{\pi}\gamma_G} \right) \exp \left( - \frac{(E - E_0)^2}{\gamma_G^2} \right)$$

$$f_L(E;E_0,\gamma_L) = \left( \frac{1}{\gamma_L} \right) \left( 1 + \frac{(E - E_0)^2}{\gamma_L^2} \right)^{-1}$$

$$\text{with } \Gamma = 2\sqrt{\ln 2}\gamma_G = 2\gamma_L$$

**Table S2** Parameters determined by the band deconvolution of absorption and MCD spectra of  $\text{Pc}_2\text{Tb}^-$  doped in PMMA measured at 100K and 1.5K.

| $E_0$ (cm <sup>-1</sup> ) <sup>a</sup> | $\Gamma$ (cm <sup>-1</sup> ) <sup>a</sup> | $\eta^a$ | $D_0$ | $A_1/D_0$ |      | $B_0/D_0$ |         |
|----------------------------------------|-------------------------------------------|----------|-------|-----------|------|-----------|---------|
|                                        |                                           |          |       | 100K      | 1.5k | 100K      | 1.5K    |
| 14416                                  | 458                                       | 0.83     | 3.4   |           |      | 0.0       | 0.0     |
| 14723                                  | 614                                       | 0.27     | 7.1   | 2.4       | 6.5  | -0.0024   | 0.0094  |
| 15275                                  | 614                                       | 0.27     | 3.8   |           |      | -0.0035   | -0.0084 |
| 15894                                  | 614                                       | 0.27     | 5.5   |           |      | -0.00096  | 0.019   |
| 16250                                  | 624                                       | 0.50     | 18.6  | 2.4       | 10.0 | 0.00091   | -0.019  |
| 17021                                  | 624                                       | 0.50     | 1.9   |           |      | 0.0049    | 0.013   |
| 17723                                  | 624                                       | 0.50     | 1.6   |           |      | 0.010     | 0.030   |
